# Supplementary material for: Identification of Chemical Markers for the Discrimination of Radix Angelica sinensis Grown in Geoherb and Non-Geoherb Regions Using UHPLC-QTOF-MS/MS Based Metabolomics
Source: PubMed Central journal article supplement (PMC6804141; doi:10.3390/molecules24193536), 2019-09-30

# Characteristic Chemical Markers for the Discrimination of *Radix Angelica sinensis* between Geoherb and non-Geoherb Regions by UHPLC-QTOF-MS/MS Based on Metabolomics Approach

Kaixue Zhang<sup>1</sup>, Menglin Yan<sup>2</sup>, Shu Han<sup>3</sup>, Longfei Cong<sup>2</sup>, Liyao Wang<sup>1</sup>, Liu Zhang<sup>1</sup>, Lili Sun<sup>1</sup>, Haiying Bai<sup>1</sup>, Guanhua Wei<sup>1</sup>, Hong Du<sup>3</sup>, Min Jiang<sup>2</sup>, Gang Bai<sup>2</sup>, Zhigang Yang<sup>1,\*</sup>

<sup>1</sup>School of Pharmacy, Lanzhou University, Lanzhou 730000, China; zhangkx2018@lzu.edu.cn (K.Z.); lywang17@lzu.edu.cn (L.W.); zhangliu17@lzu.edu.cn (L.Z.); sunll2018@lzu.edu.cn (L.S.); baihy14@lzu.edu.cn (H.B.); weigh2018@lzu.edu.cn (G.W.)

<sup>2</sup>College of Pharmacy, Nankai University, State Key Laboratory of Medicinal Chemical Biology, Tianjin 300350, China; 15736875593@163.com (M.Y.); 2120181290@mail.nankai.edu.cn (L.C.); minjiang@nankai.edu.cn (M.J.); gangbai@nankai.edu.cn (G.B.)

<sup>3</sup>School of Chinese Materia Medica, Beijing University of Chinese Medicine, Beijing 100029, China; hs361015@163.com (S.H.); duhong@vip.163.com (H.D.)

\* Correspondence: yangzg@lzu.edu.cn (Z.Y.); Tel.: +86-931-8915202

**Table S1** Origin of the RAS samples

| Sample No | origin                                                          |
|-----------|-----------------------------------------------------------------|
| 1         | Xintian Village, Banqiao Town, Enshi City, Hubei Province       |
| 2         | Xintian Village, Banqiao Town, Enshi City, Hubei Province       |
| 3         | Shiyao County, Enshi City, Hubei Province                       |
| 4         | Shiyao County, Enshi City, Hubei Province                       |
| 5         | Zanzha Village, Huzhu County, Haidong City, Qinghai Province    |
| 6         | Yahe Village, Huzhu County, Haidong City, Qinghai Province      |
| 7         | Heer Village, Huzhu County, Haidong City, Qinghai Province      |
| 8         | Yaojiagou Village, Huzhu County, Haidong City, Qinghai Province |
| 9         | Zelin Village, Huzhu County, Haidong City, Qinghai Province     |
| 10        | North Hill, Huzhu County, Haidong City, Qinghai Province        |
| 11        | Pingba Town, Wenshan City, Yunnan Province                      |
| 12        | Pingba Town, Wenshan City, Yunnan Province                      |

|     |                                                               |
|-----|---------------------------------------------------------------|
| 13  | Lijiang City, Yunnan Province                                 |
| 14  | Pingba Town, Wenshan City, Yunnan Province                    |
| 15  | Sanjiacun supermarket, Lijiang City, Yunnan Province          |
| 16  | Huichuan Town, Weiyuan County, Gansu Province                 |
| 17  | Tianjiagou Town, Weiyuan County, Gansu Province               |
| 18  | Huichuan Town, Weiyuan County, Gansu Province                 |
| 19  | Zhuangjiahan Cooperative, Lintan County, Gansu Province       |
| 20  | Zhuangjiahan Cooperative, Lintan County, Gansu Province       |
| 21  | Zhuangjiahan Cooperative, Lintan County, Gansu Province       |
| 22  | Lintan County, Gansu Province                                 |
| 23  | Gannan City North Community, Lintan County, Gansu Province    |
| 24  | Changchuan Town, Lintan County, Gansu Province                |
| 25  | Jinzhong Town, Zhang County, Gansu Province                   |
| 26  | Chiba Village, Chiba Town, Longnan City, Gansu Province       |
| 27  | Maying Town, Longnan City, Gansu Province                     |
| 28* | Tianjiabao Village, Xizhai Town, Min County, Gansu Province   |
| 29* | Guanshang Village, Xizhai Town, Min County, Gansu Province    |
| 30* | Zhongzhai Village, Shili Town, Min County, Gansu Province     |
| 31* | Wajie Village, Shendu Town, Min County, Gansu province        |
| 32* | Maliantan Village, Weixin Town, Min County, Gansu Province    |
| 33* | Hetuo Village, Hetuo Town, Min County, Gansu Province         |
| 34* | Shangdiema Village, Qingshui Town, Min County, Gansu Province |
| 35* | Tianjiabao Village, Xizhai Town, Min County, Gansu Province   |
| 36* | Zhongzhai Village, Shili Town, Min County, Gansu Province     |
| 37* | Maliantan Village, Weixin Town, Min County, Gansu Province    |
| 38* | Hetuo Village, Hetuo Town, Min County, Gansu Province         |
| 39* | Guanshang Village, Xizhai Town, Min County, Gansu Province    |
| 40* | Liujiagou Village, Puma Town, Min County, Gansu Province      |

\*: represents RAS samples from geoherb region.

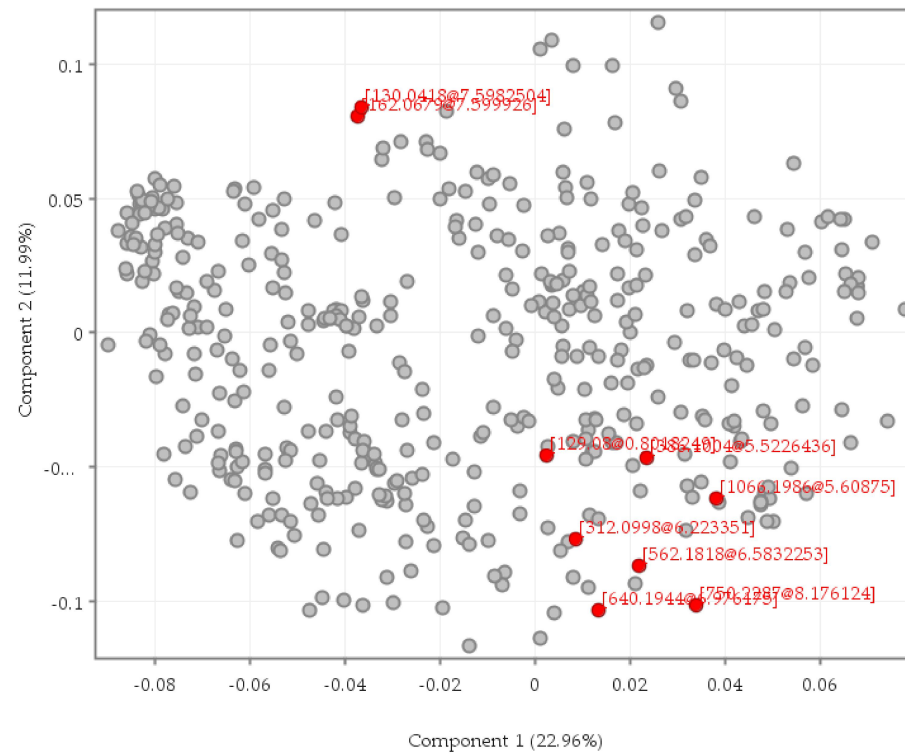

**Figure S1** The PCA loadings, highlighting the markers **M1-M9**

**Figure S2** Extracted ion chromatogram at  $m/z$  387.1074 (positive mode) of RAS from geoh herbs (a) and non-geoh herbs (b).

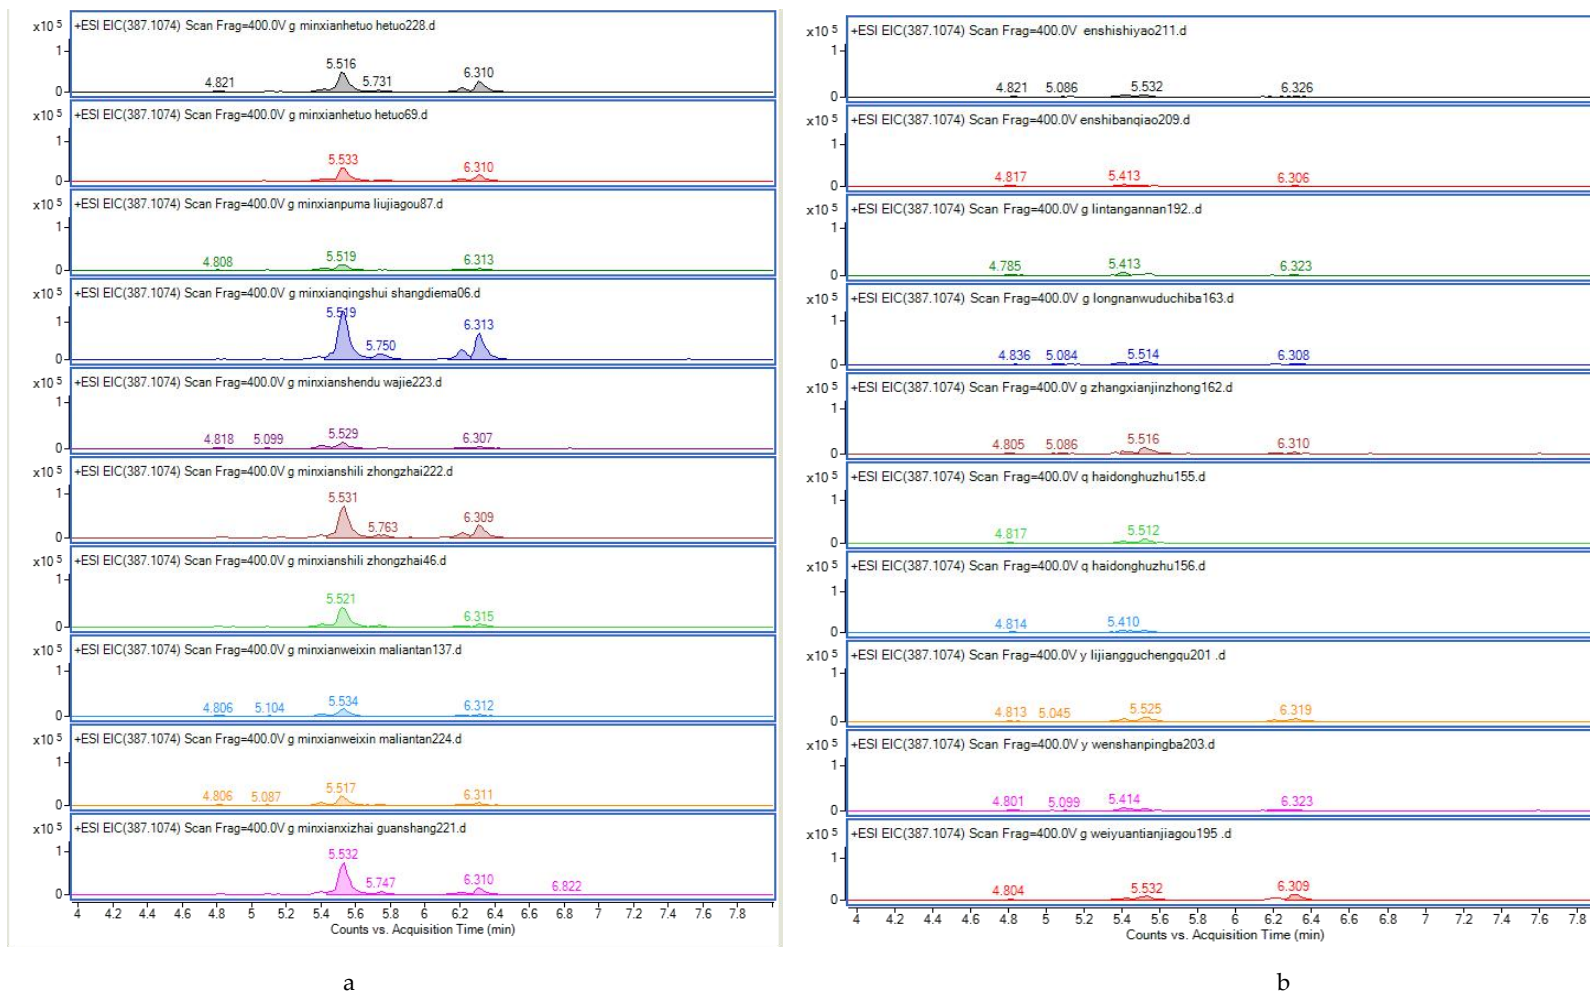

**Figure S3** The MS/MS spectra of compounds detected in RAS.

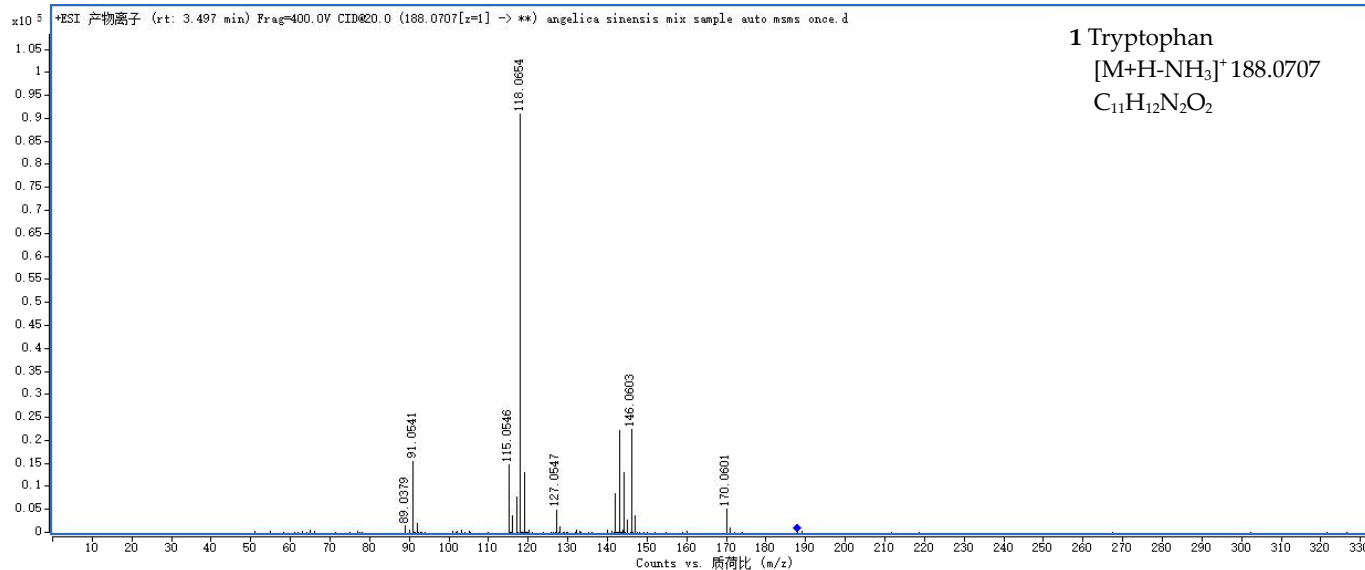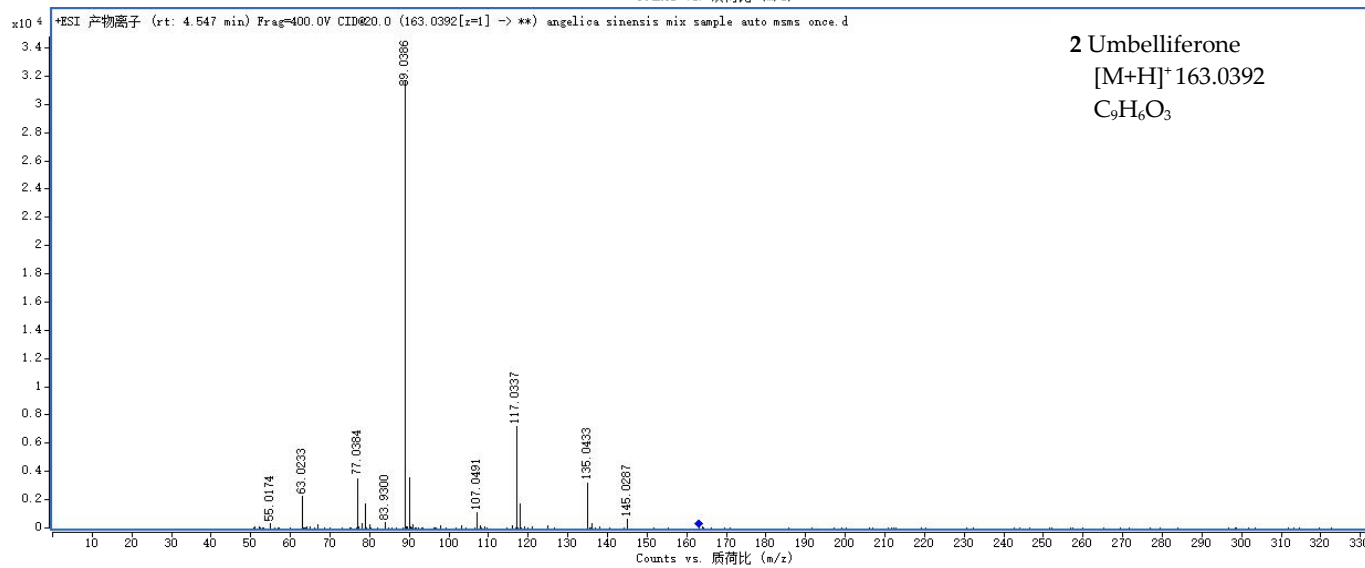

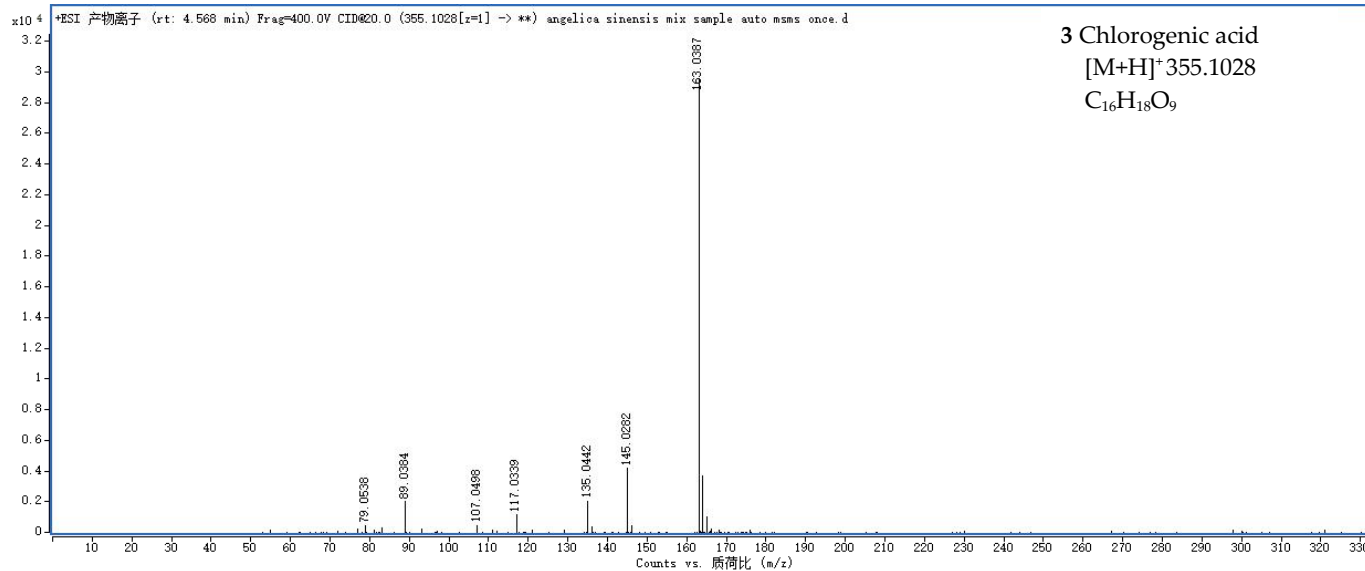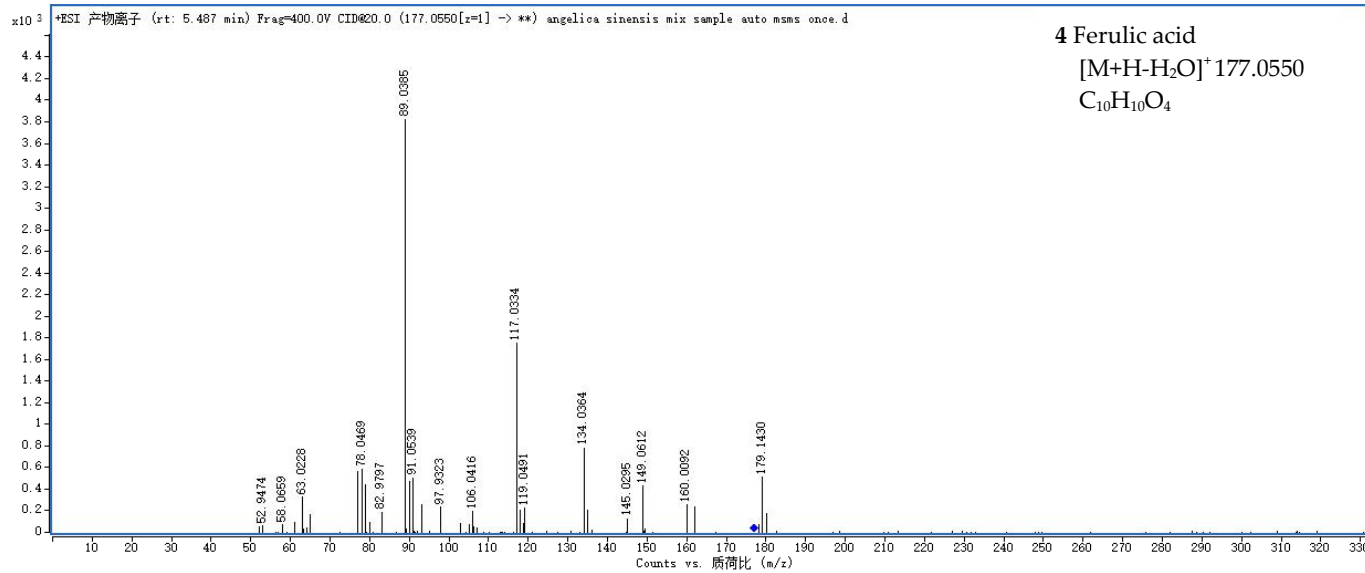

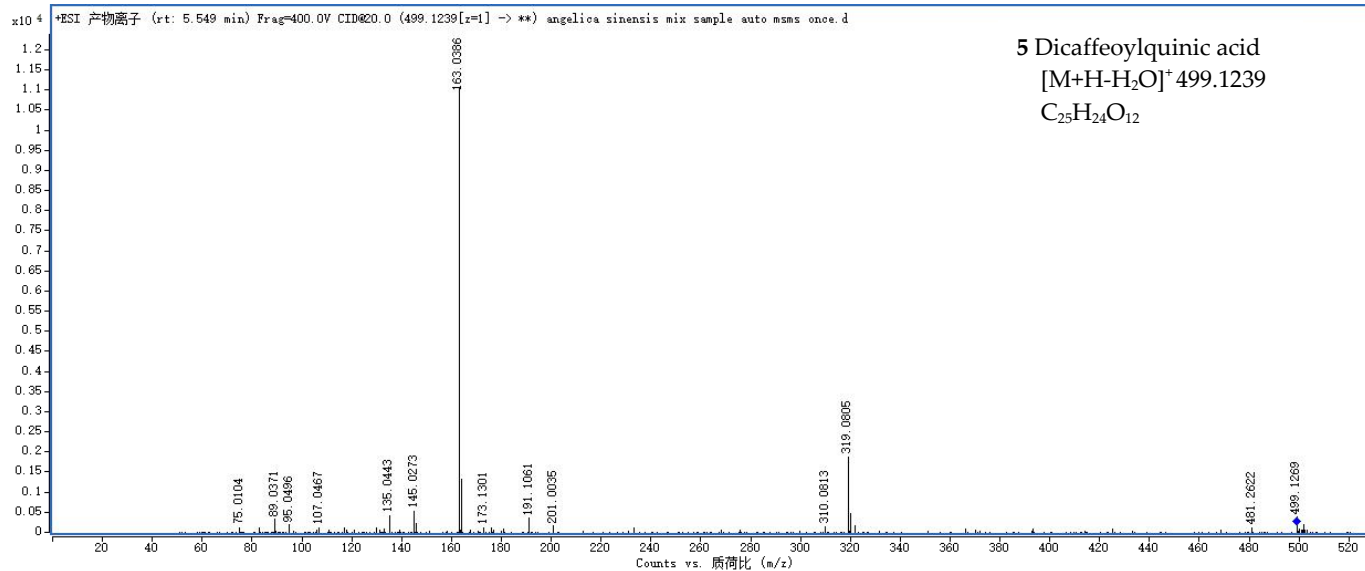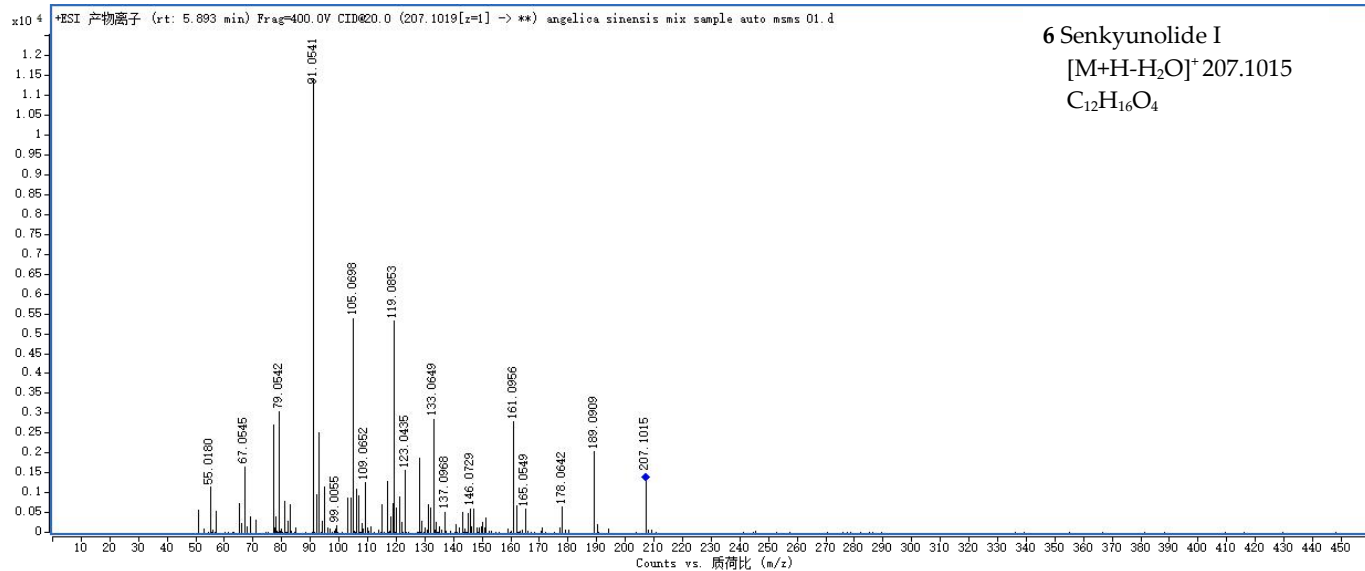

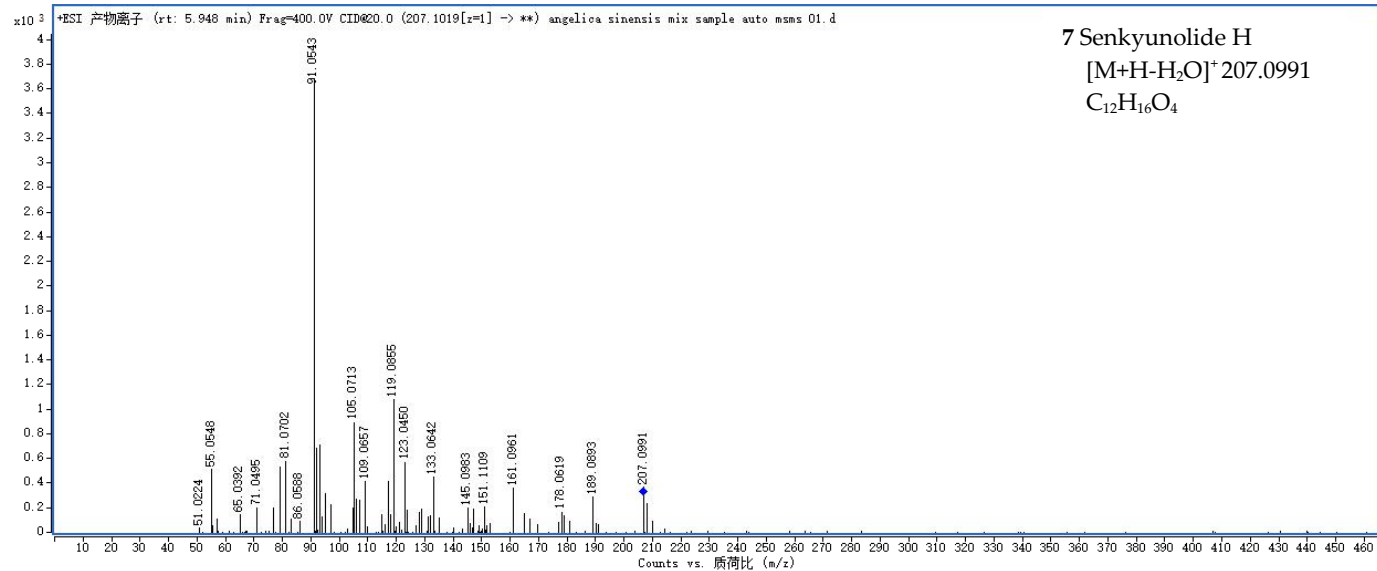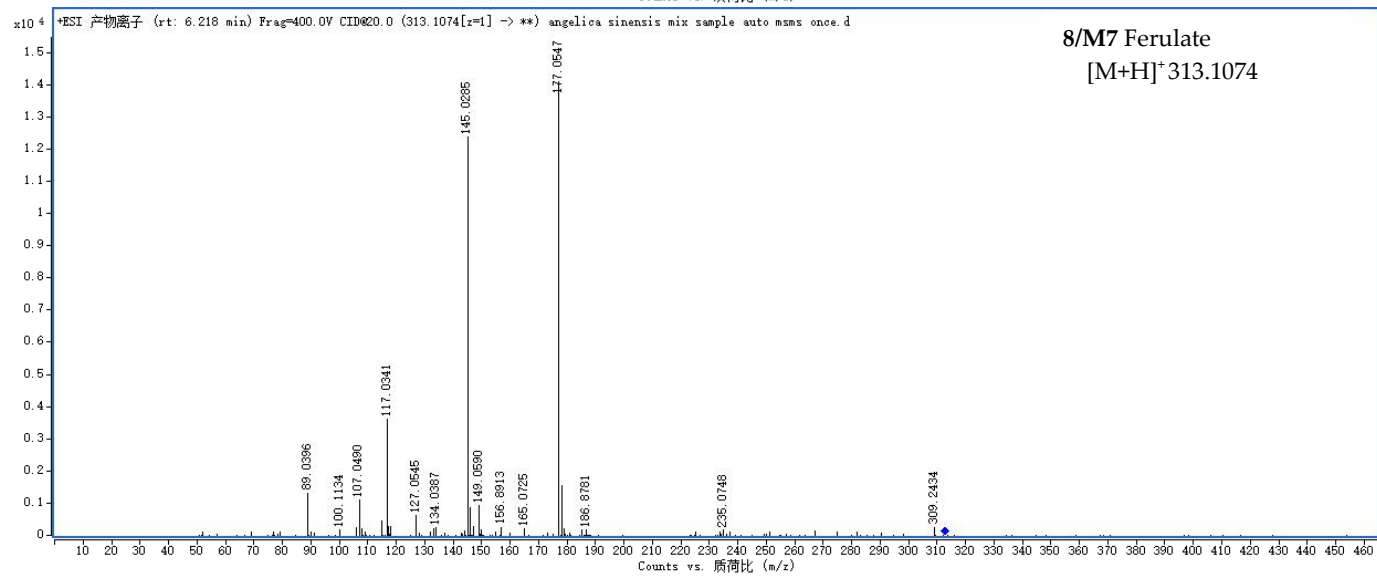



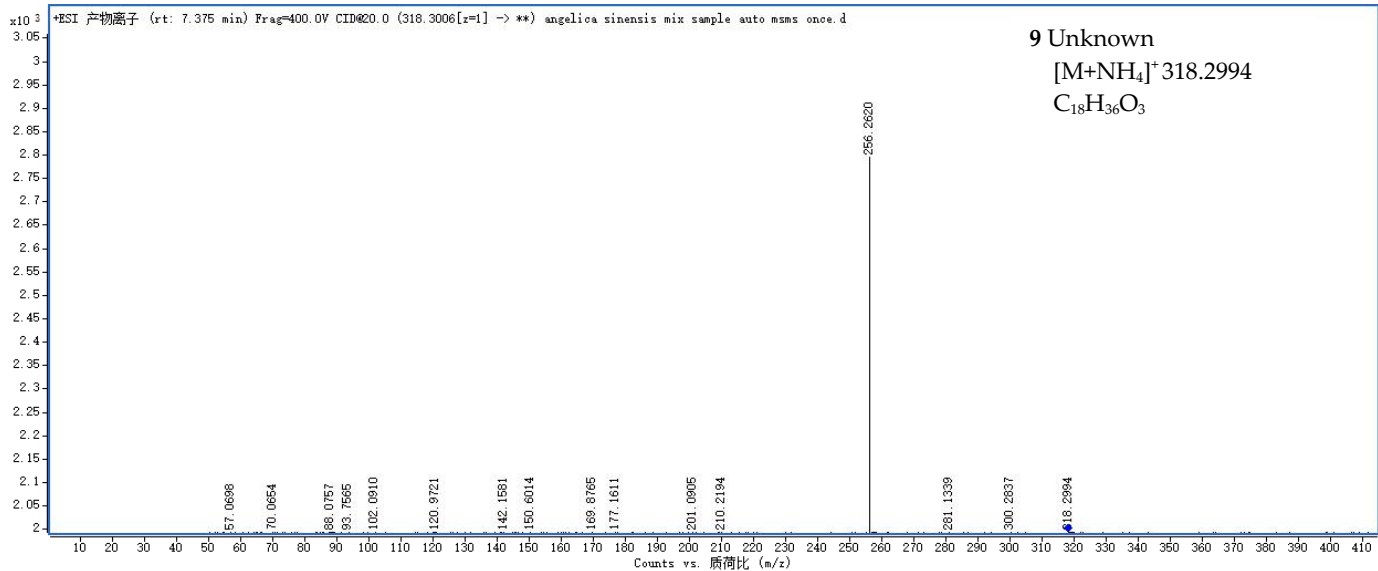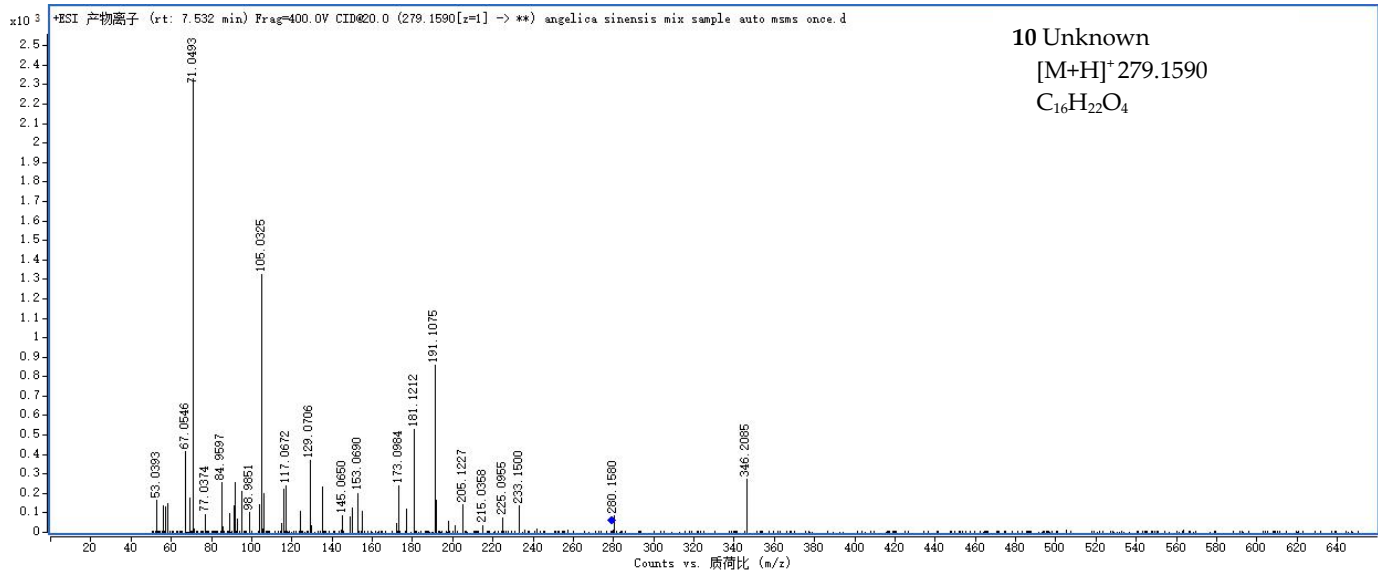

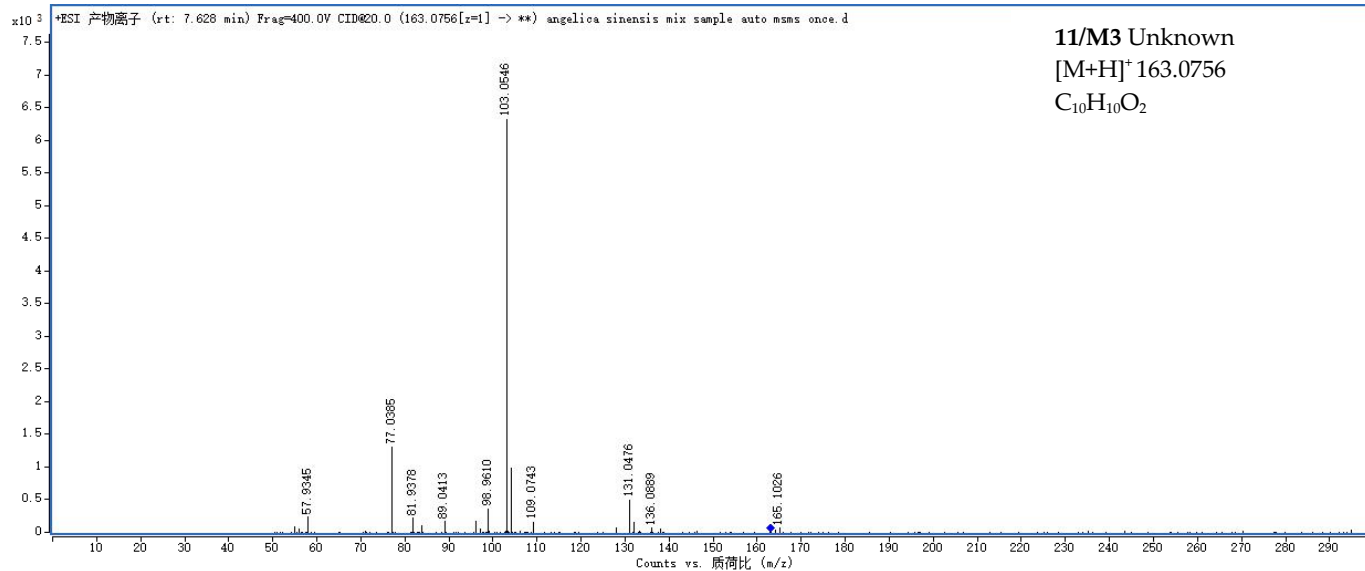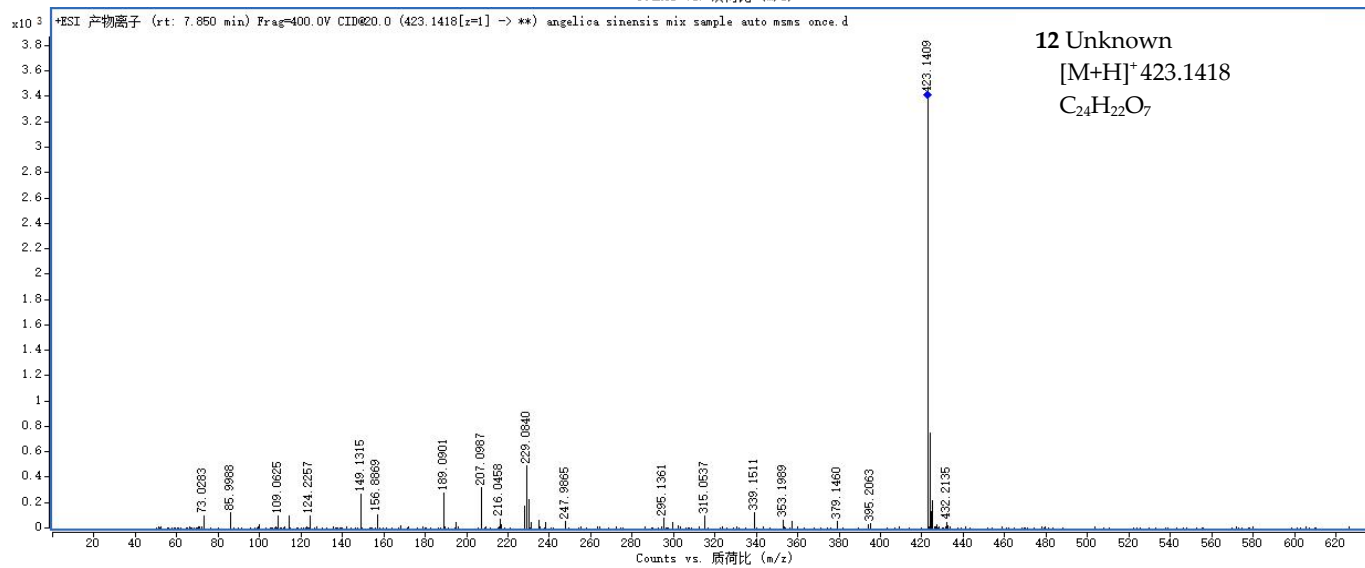

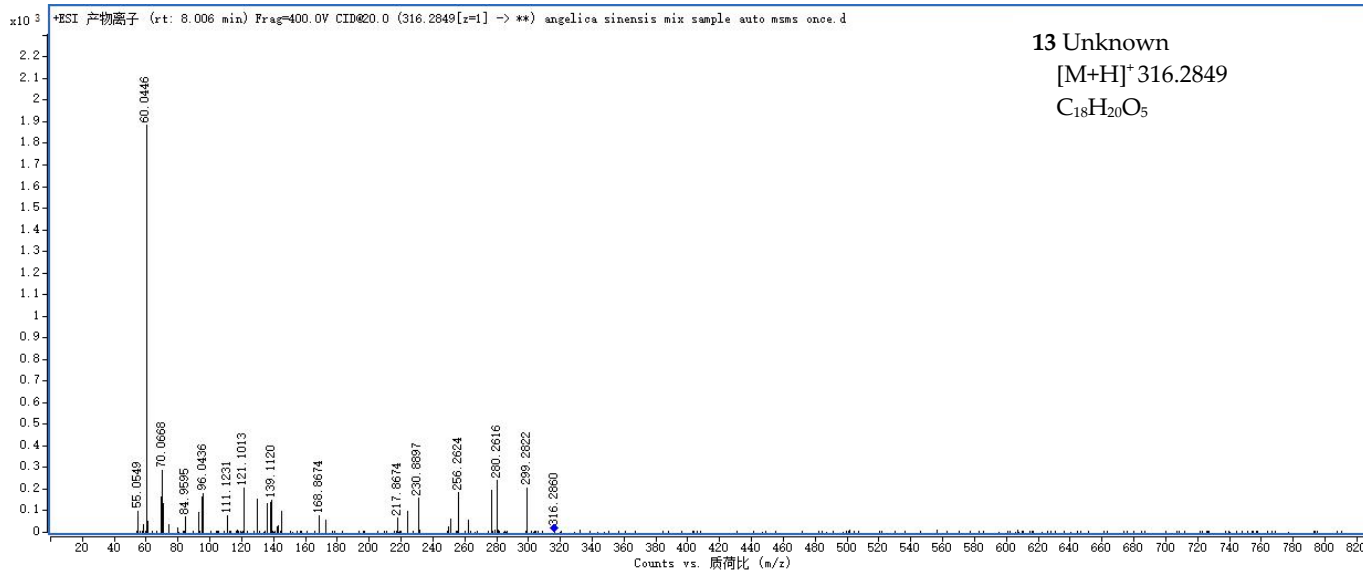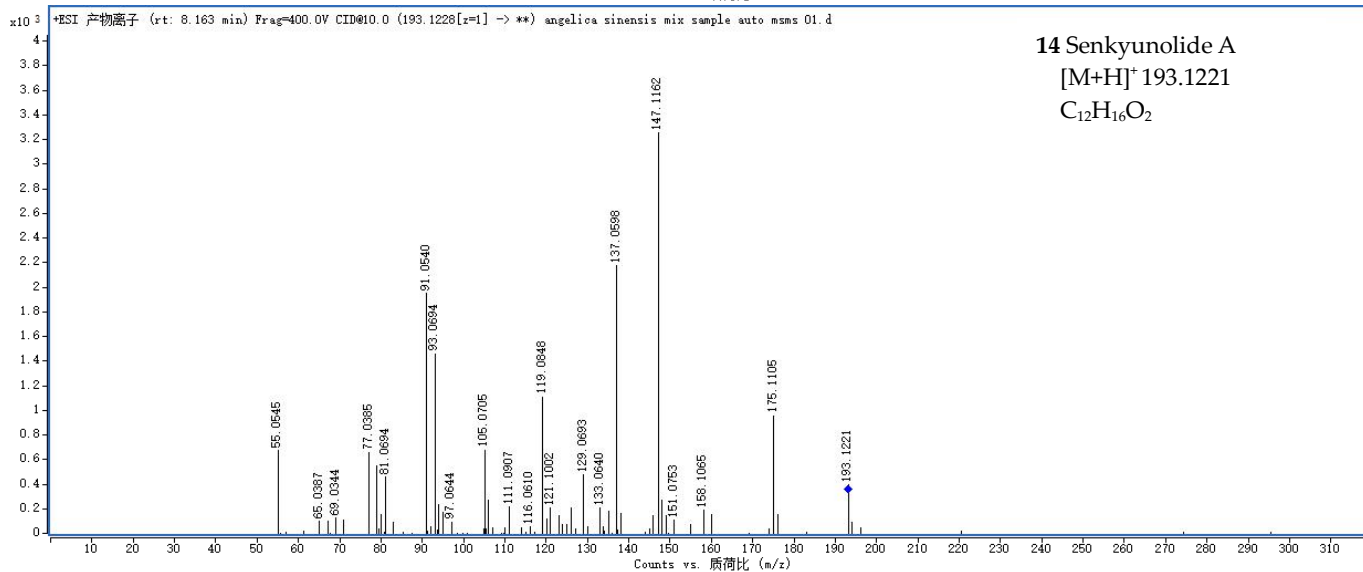

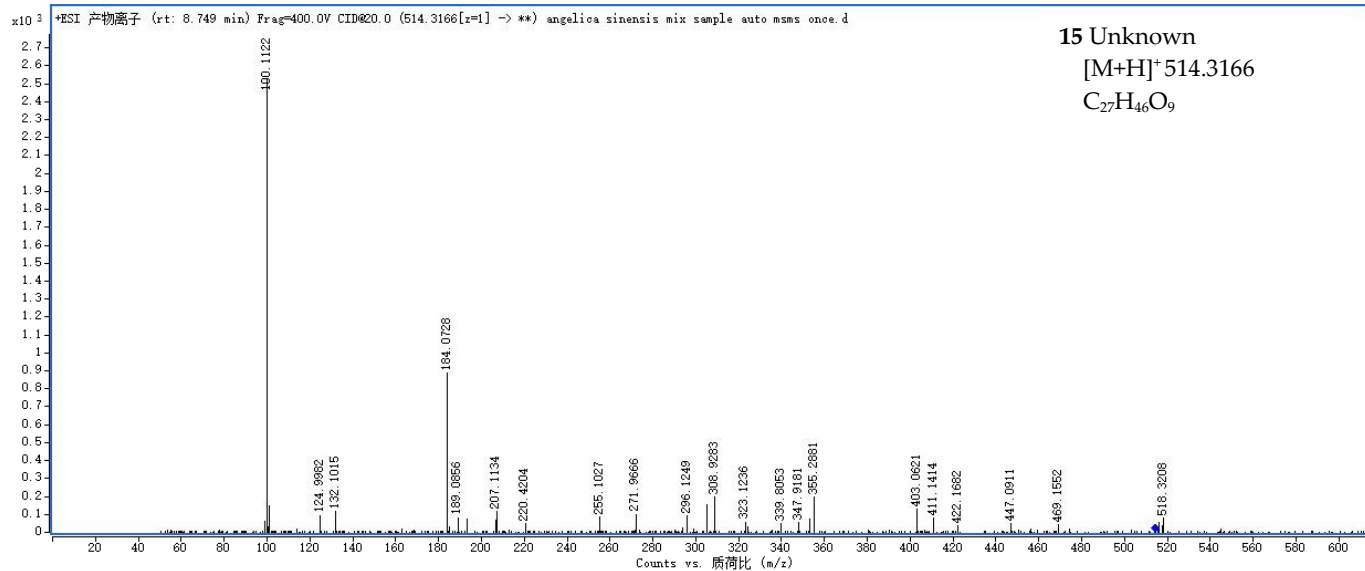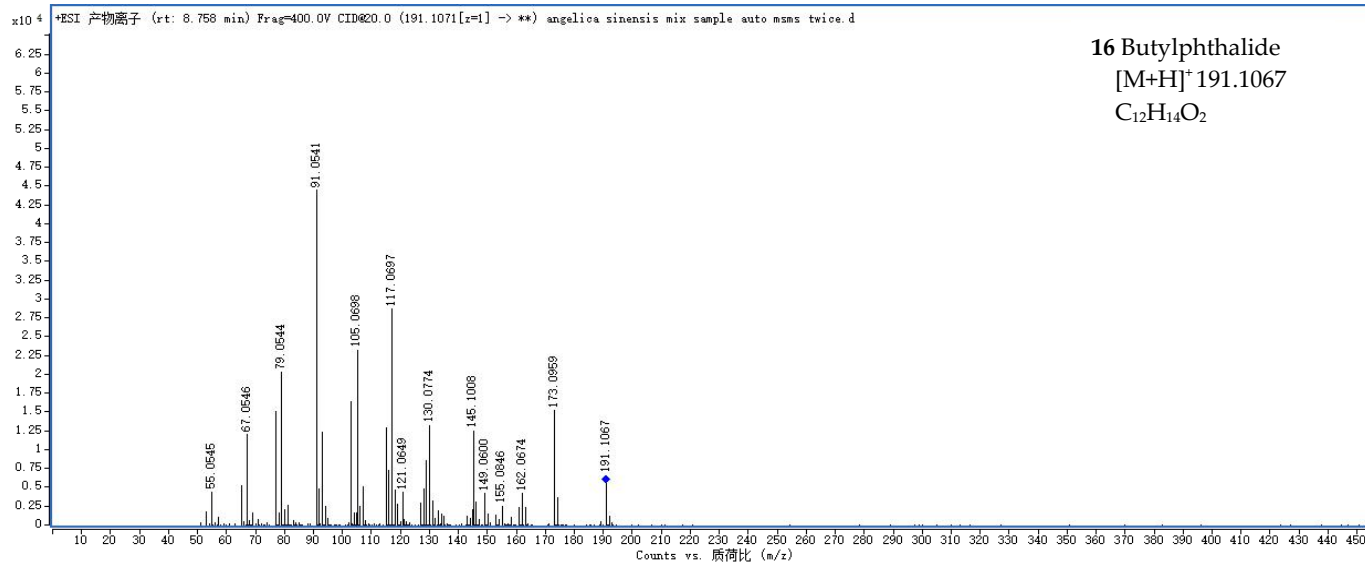

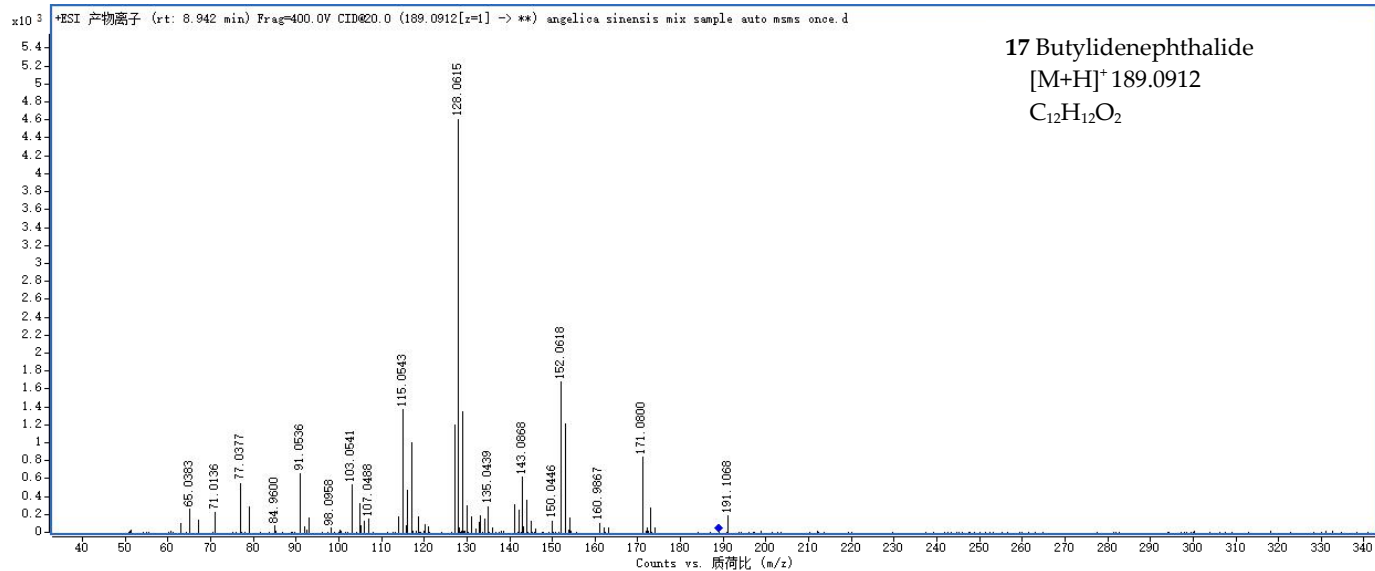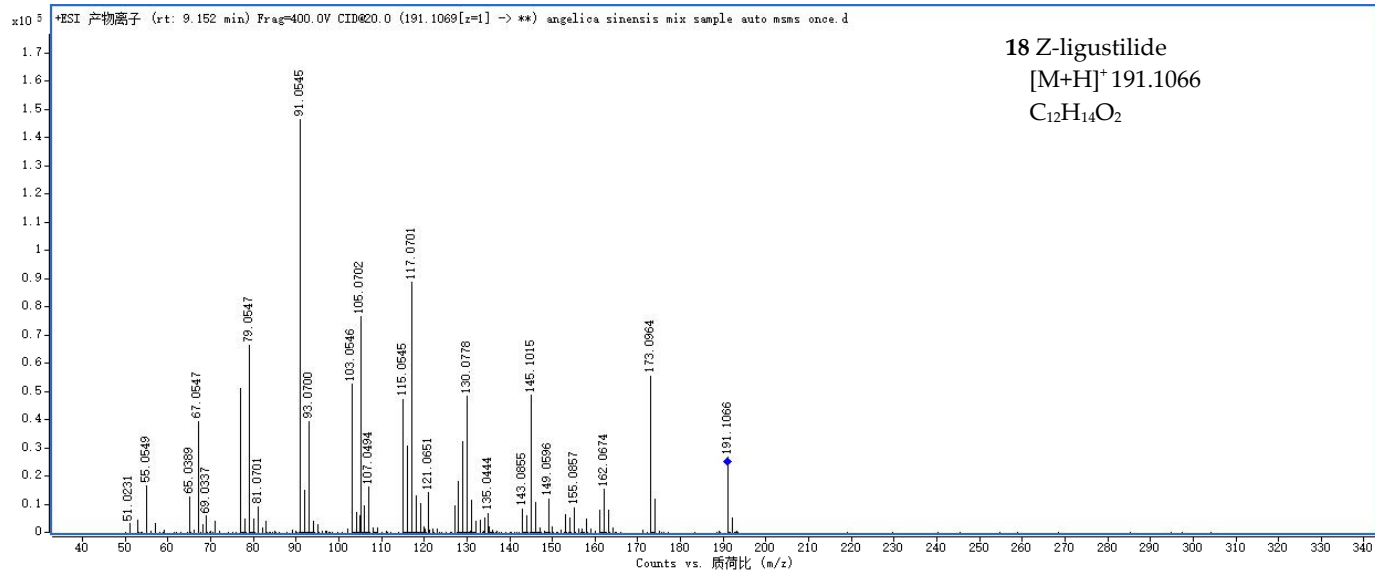

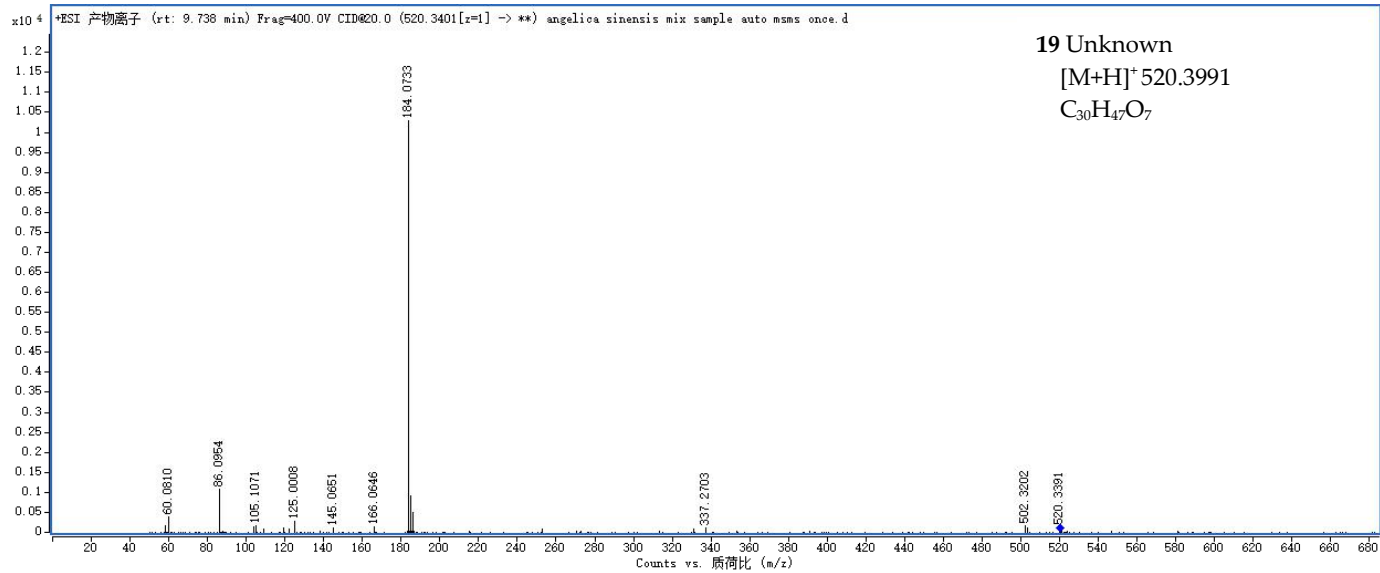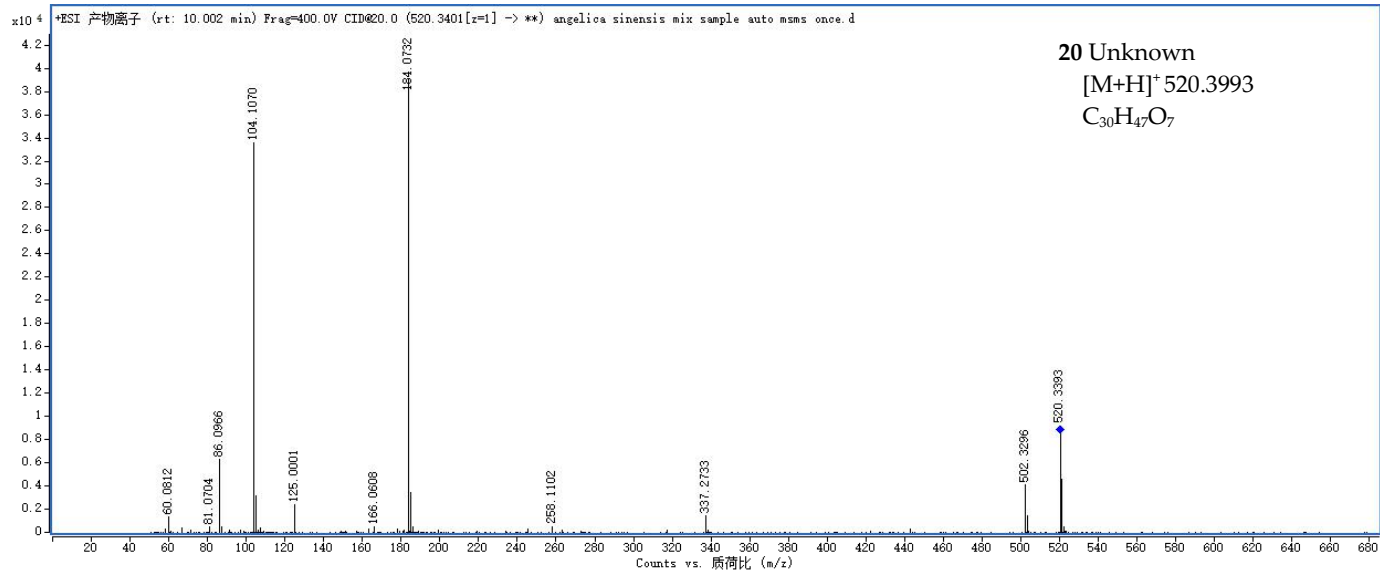

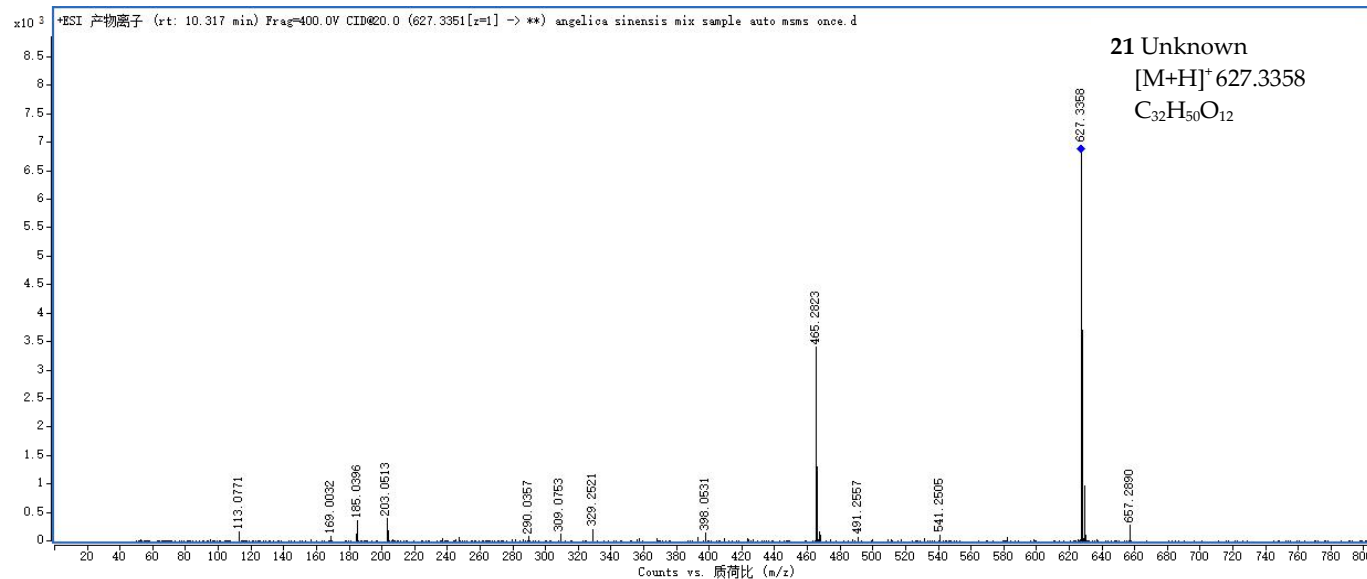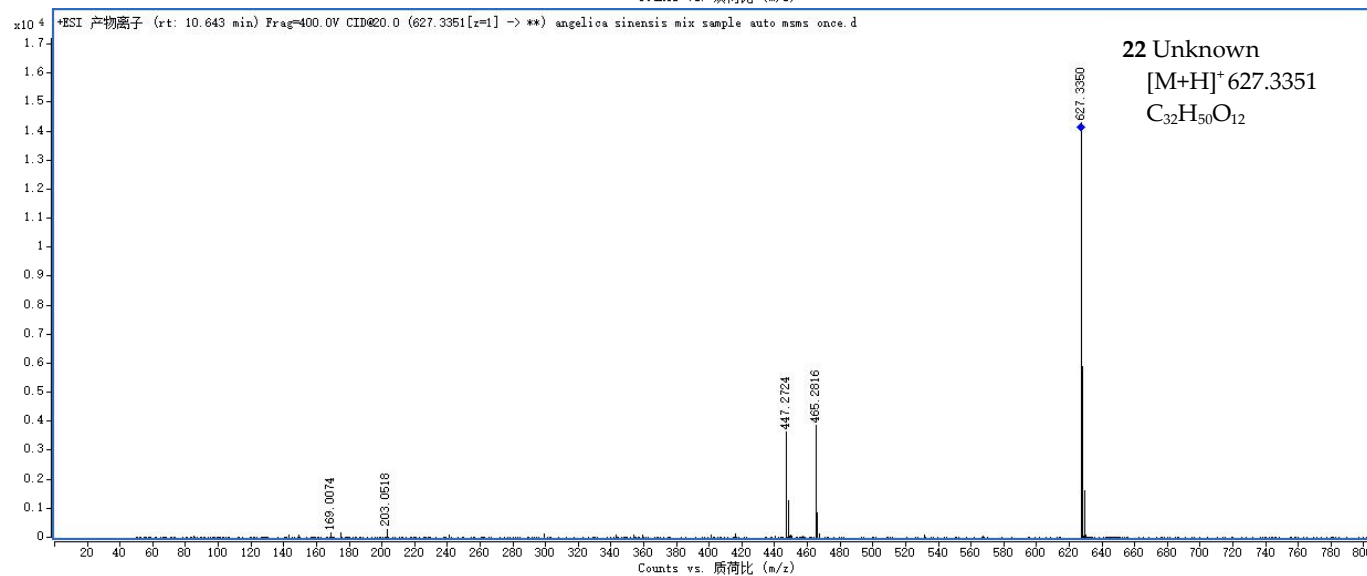

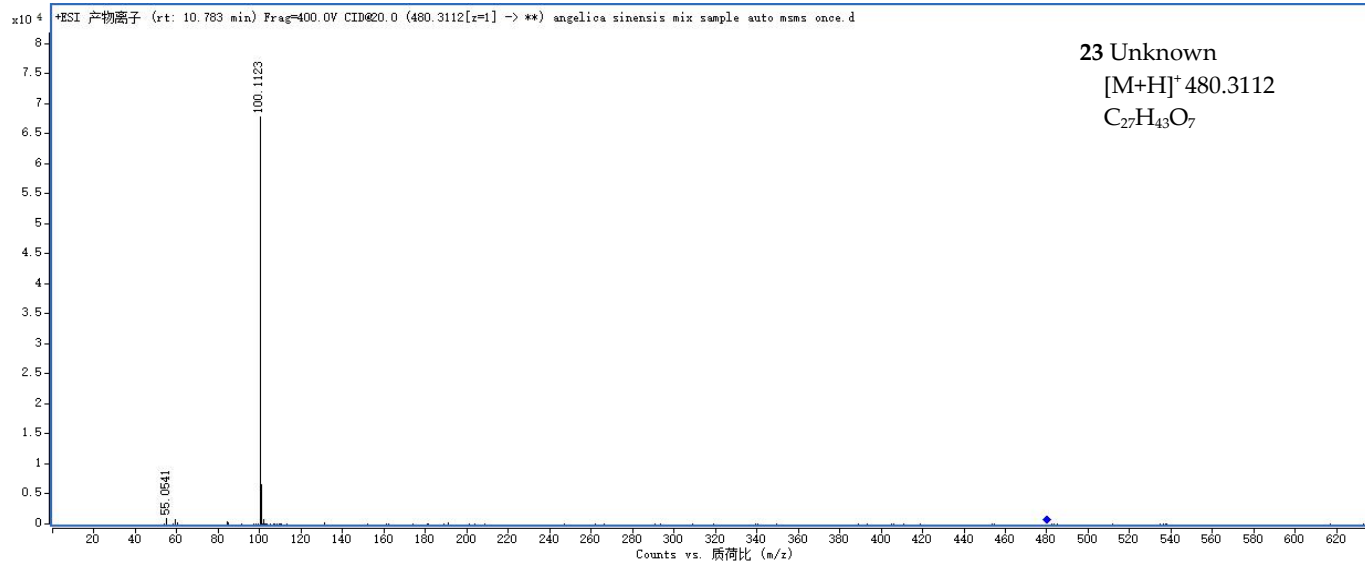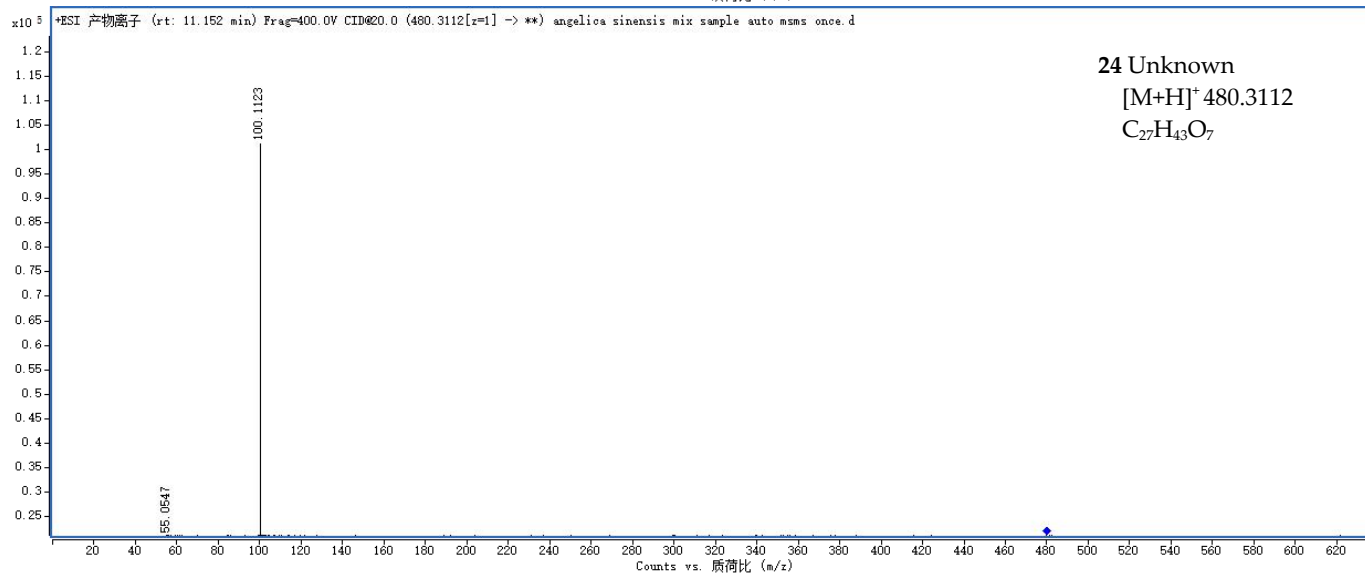



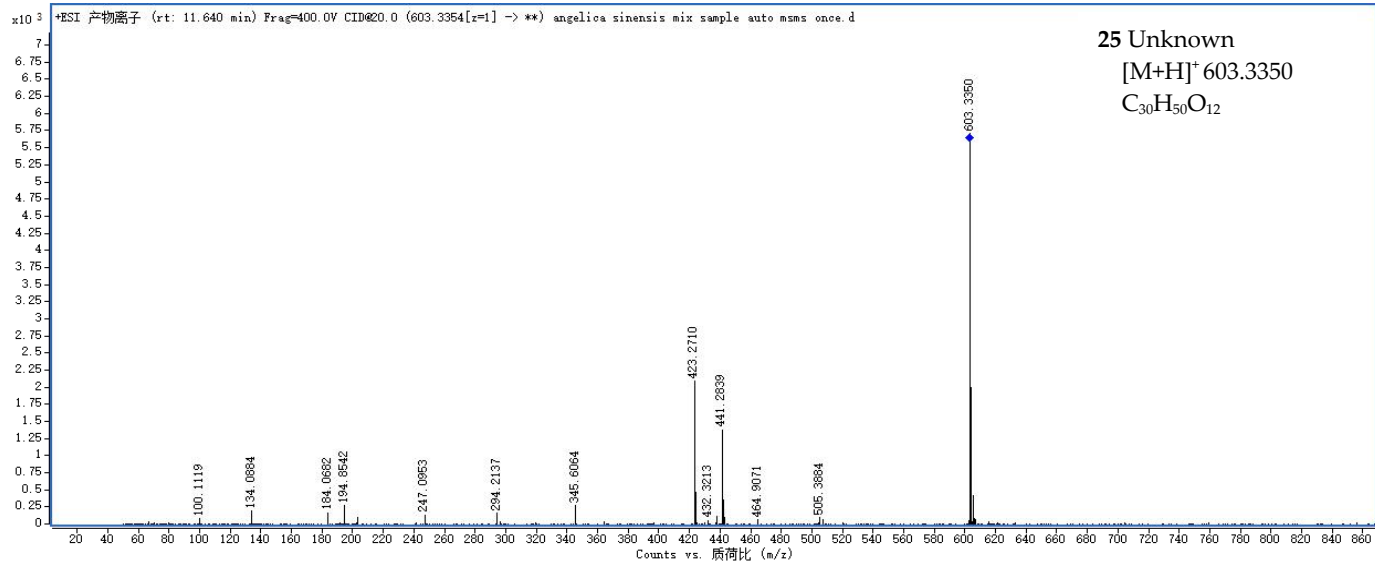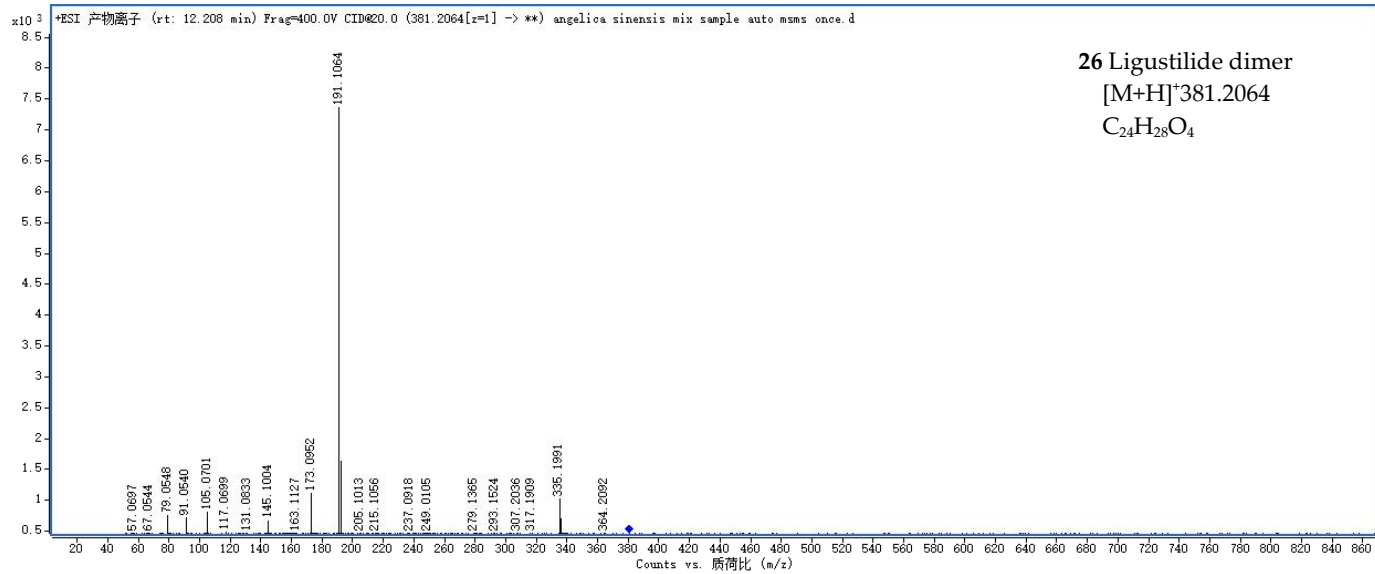

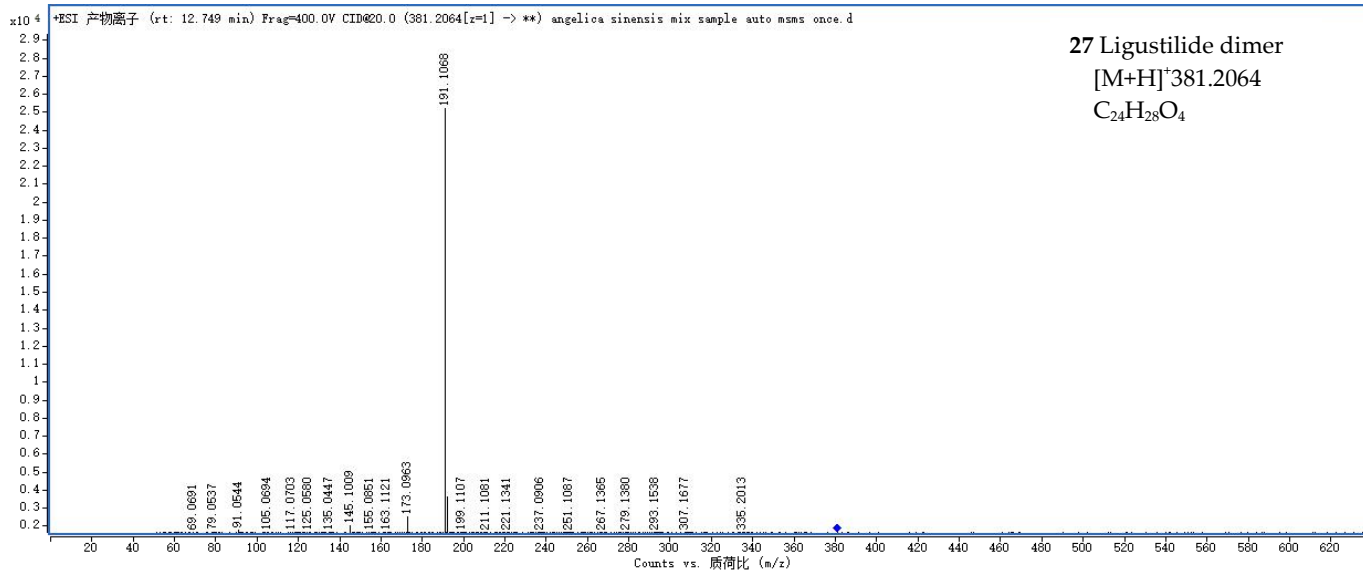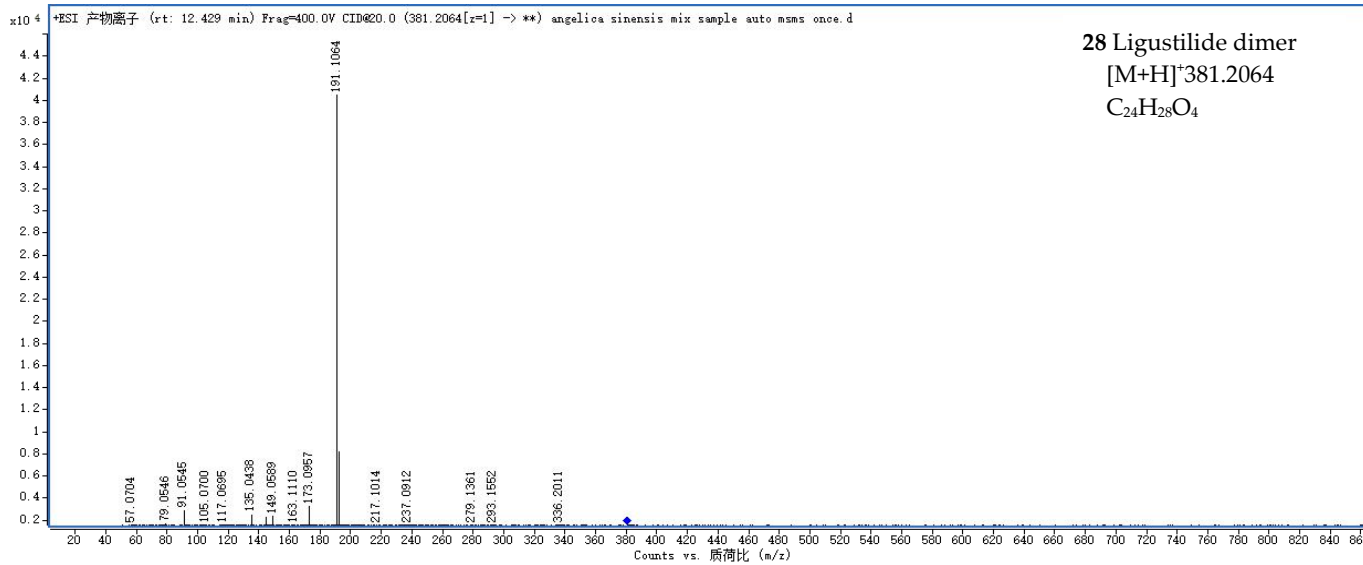

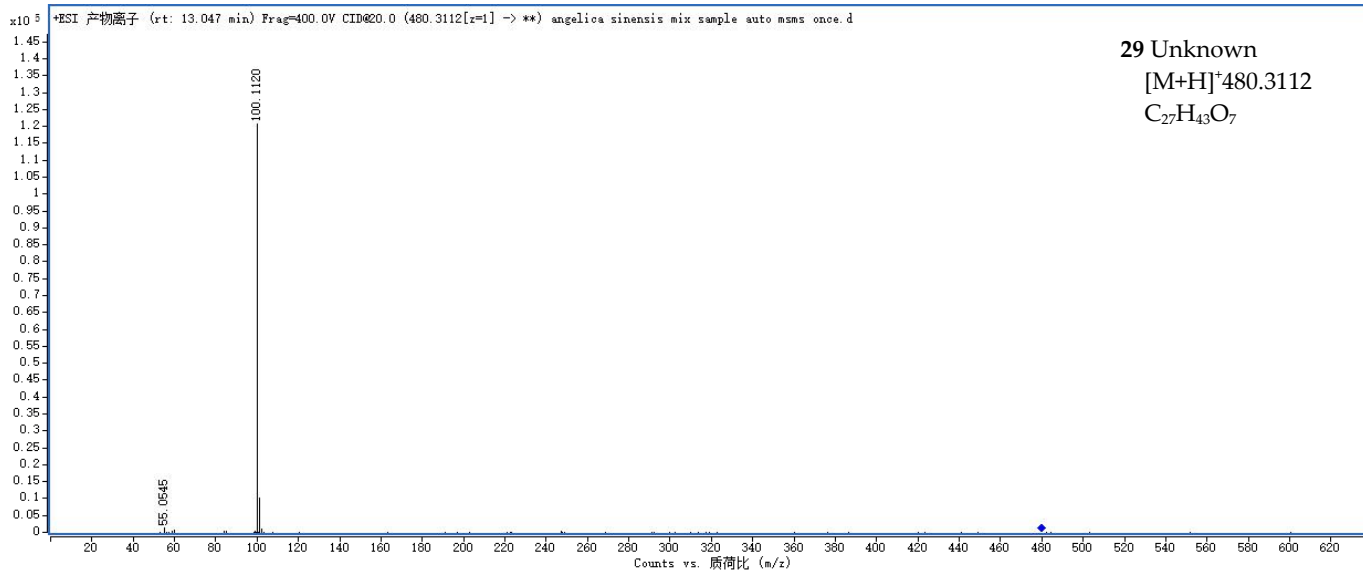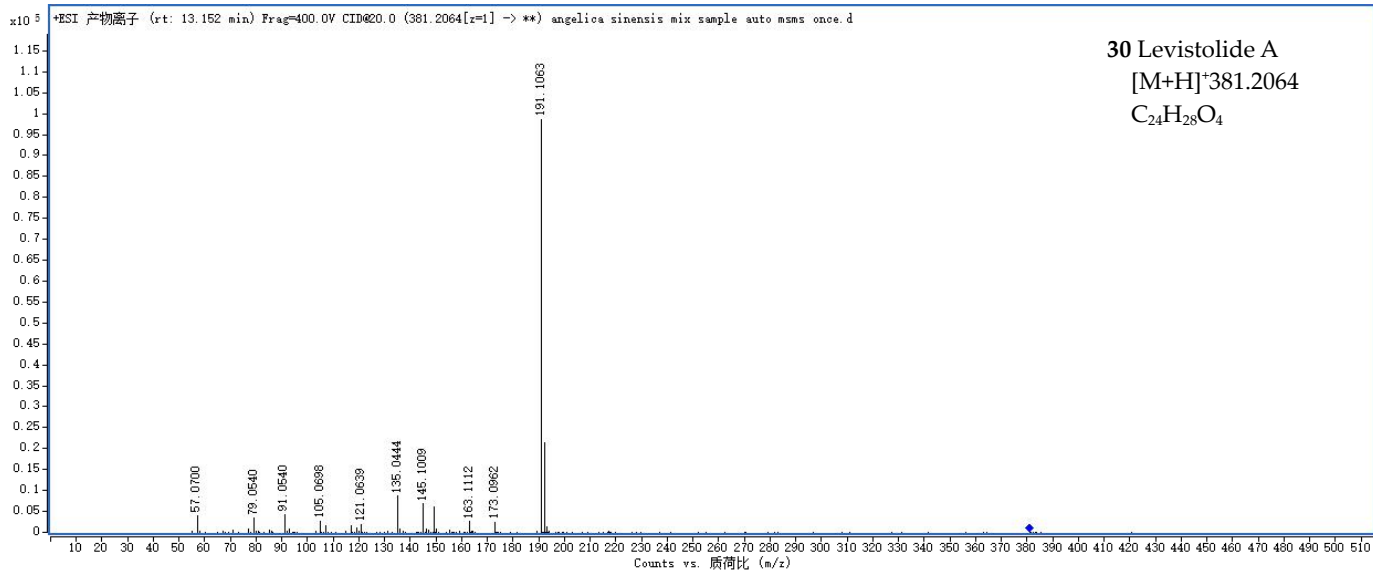

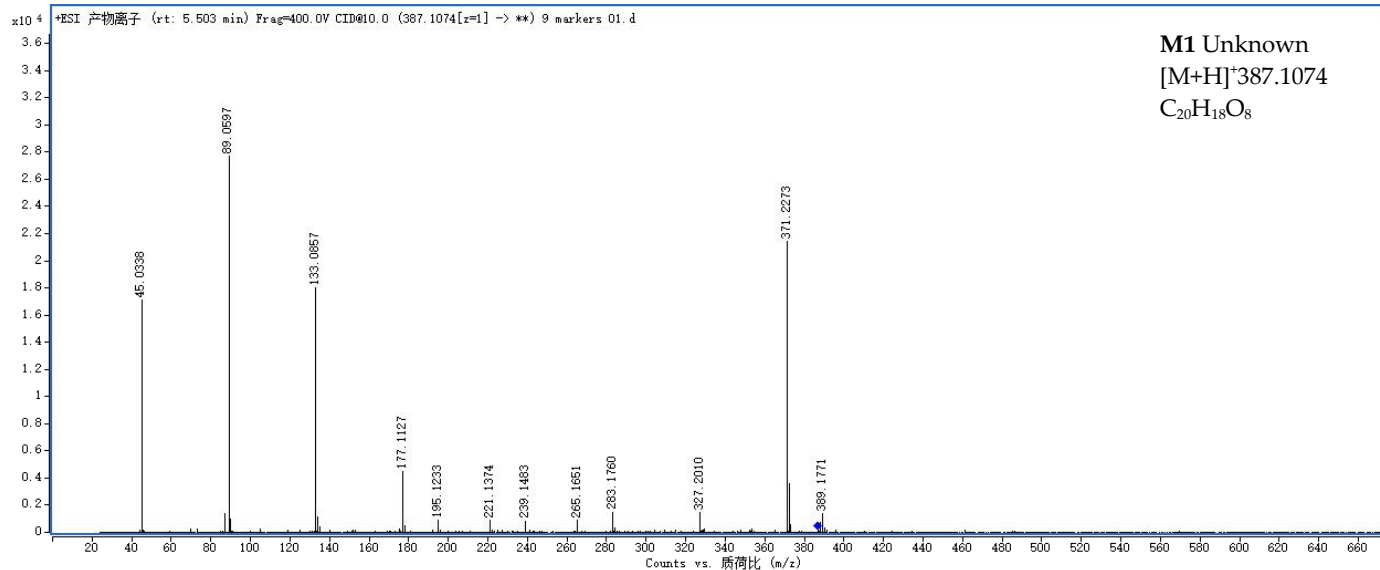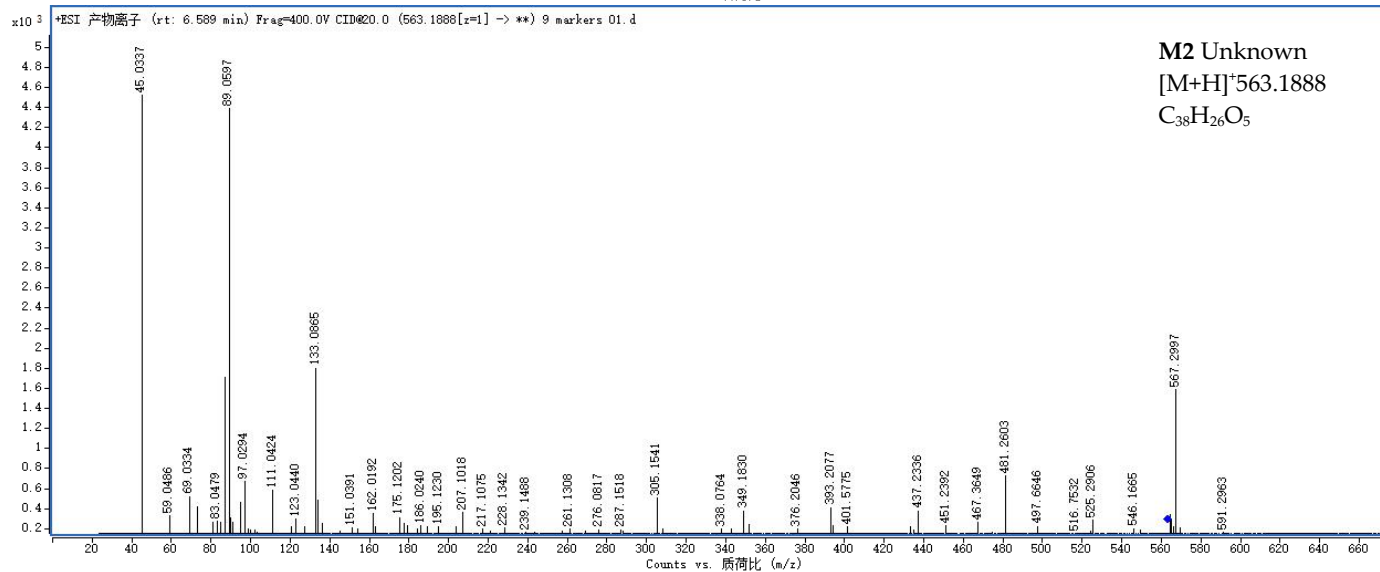

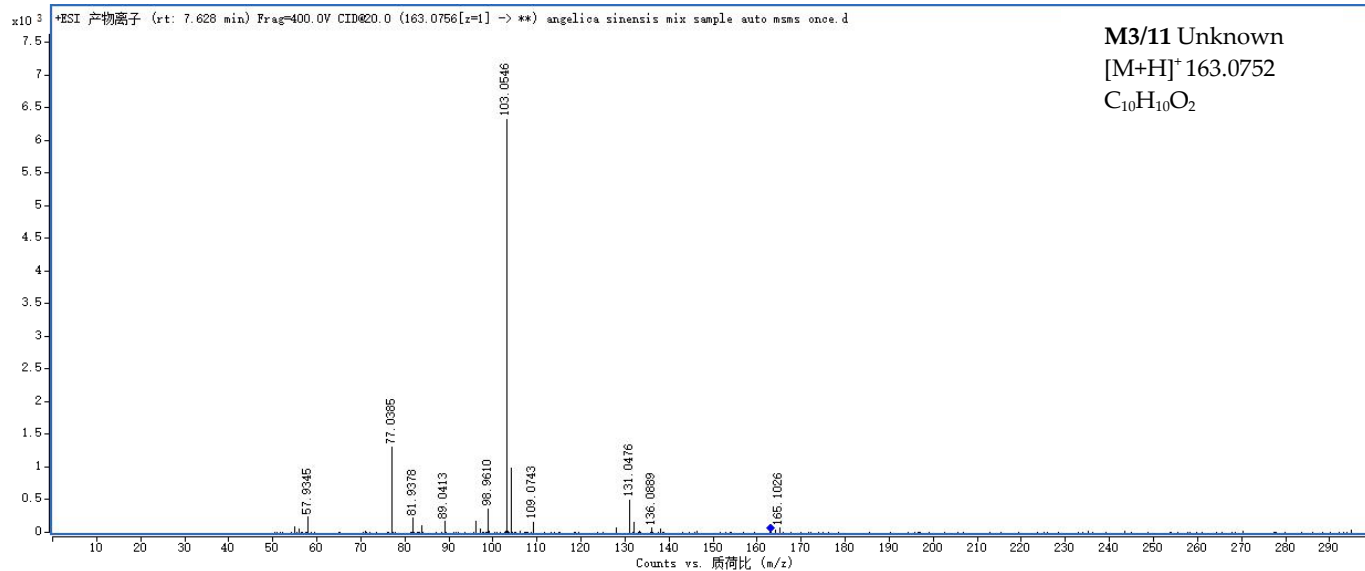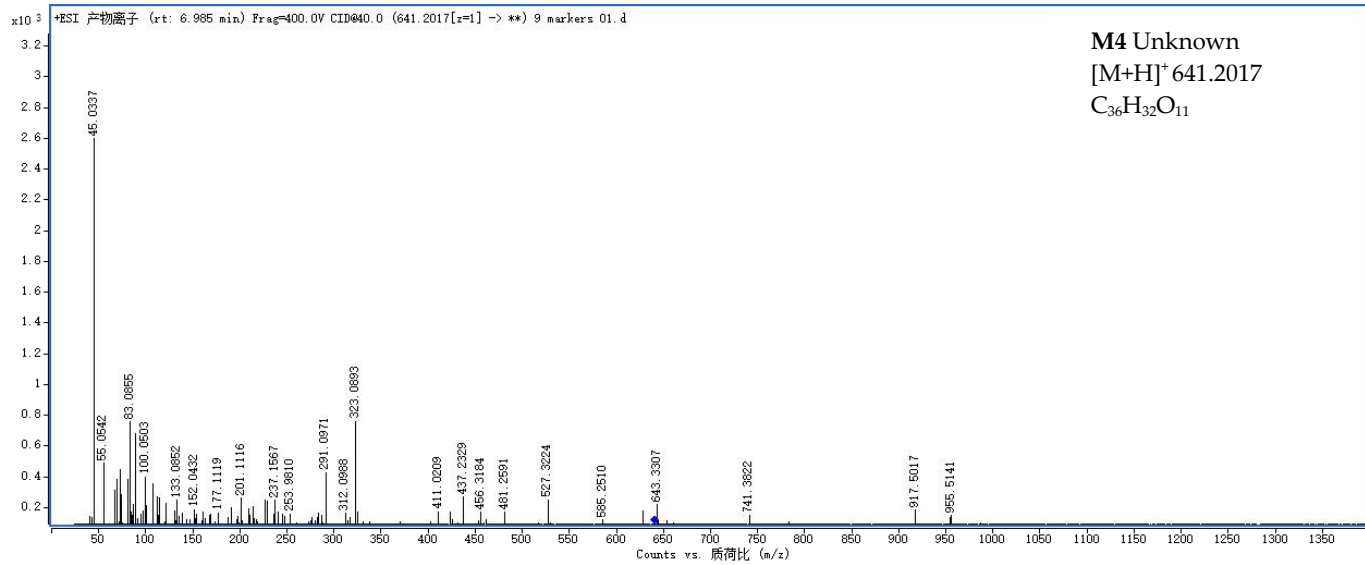

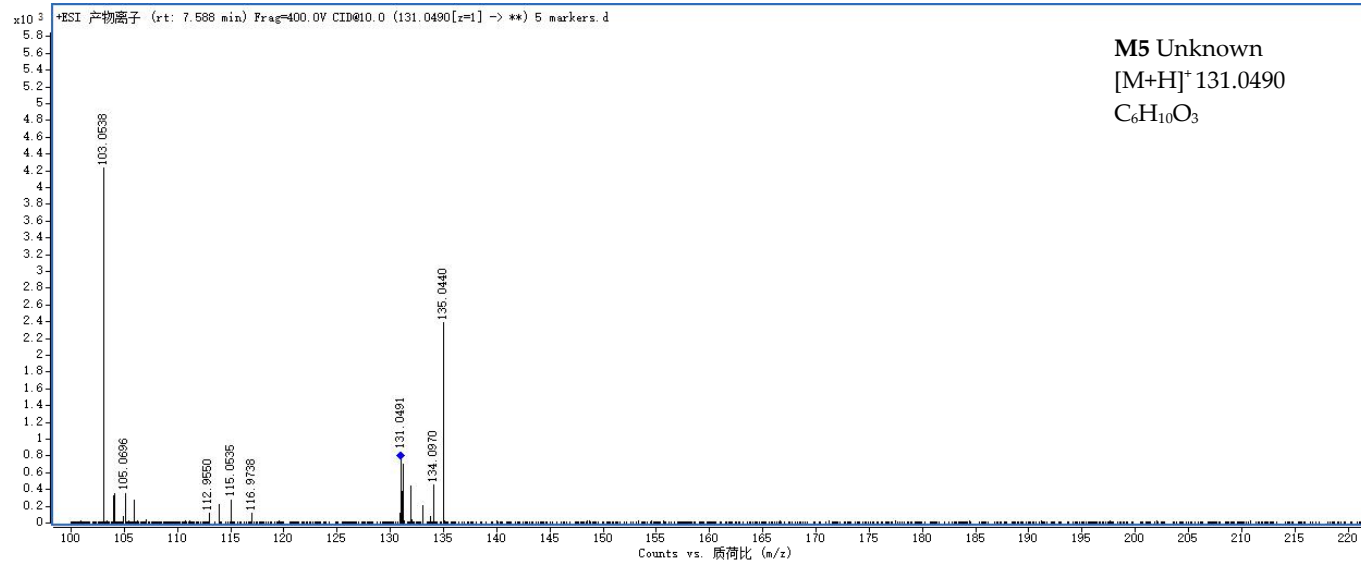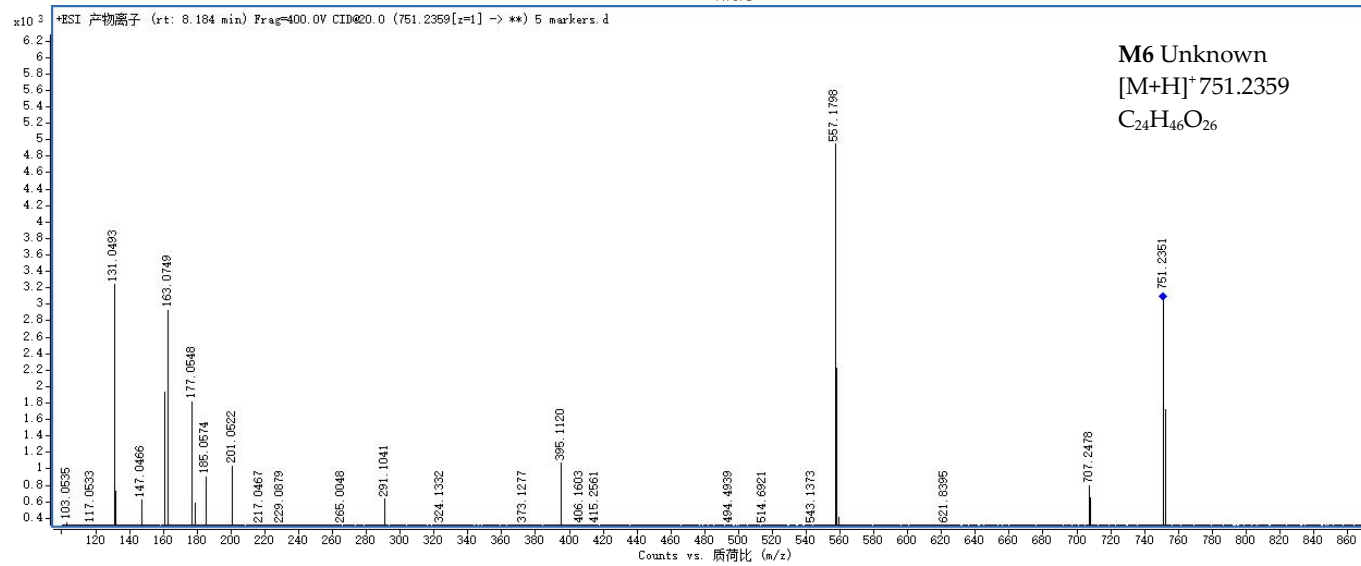

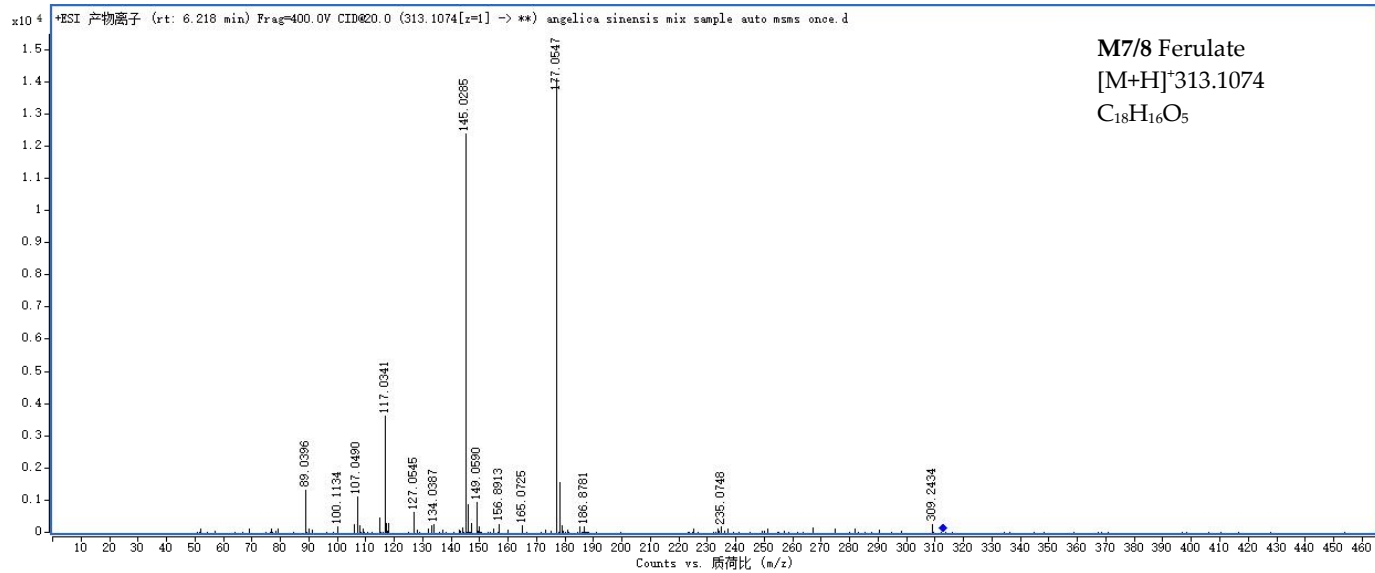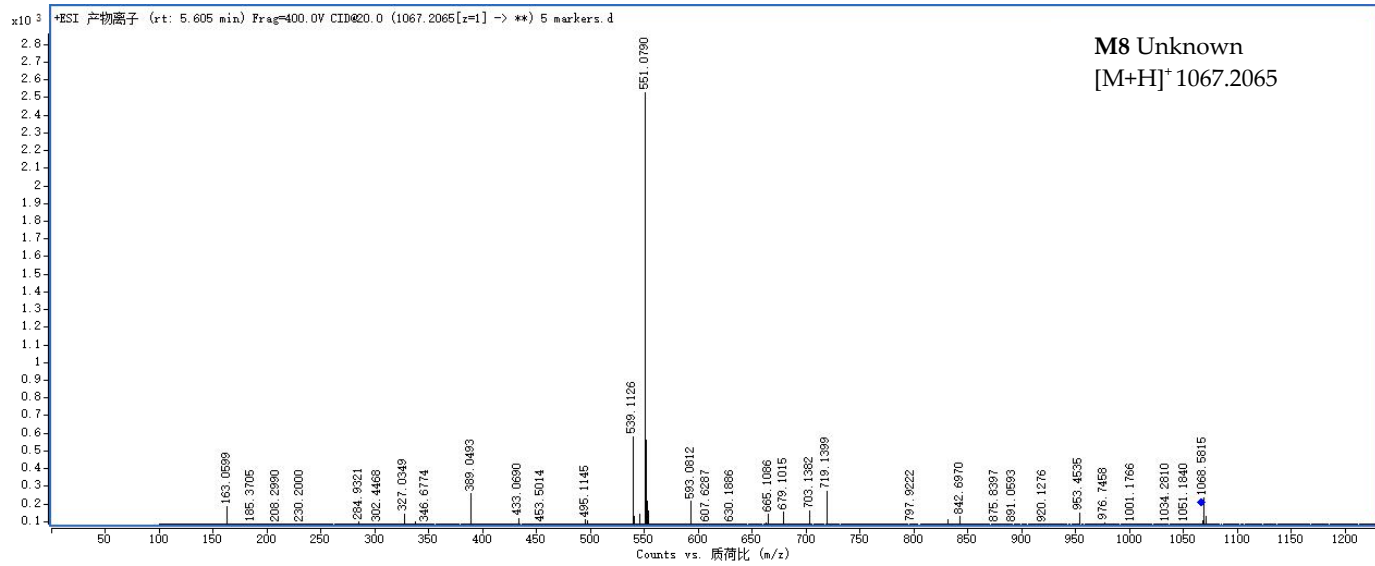

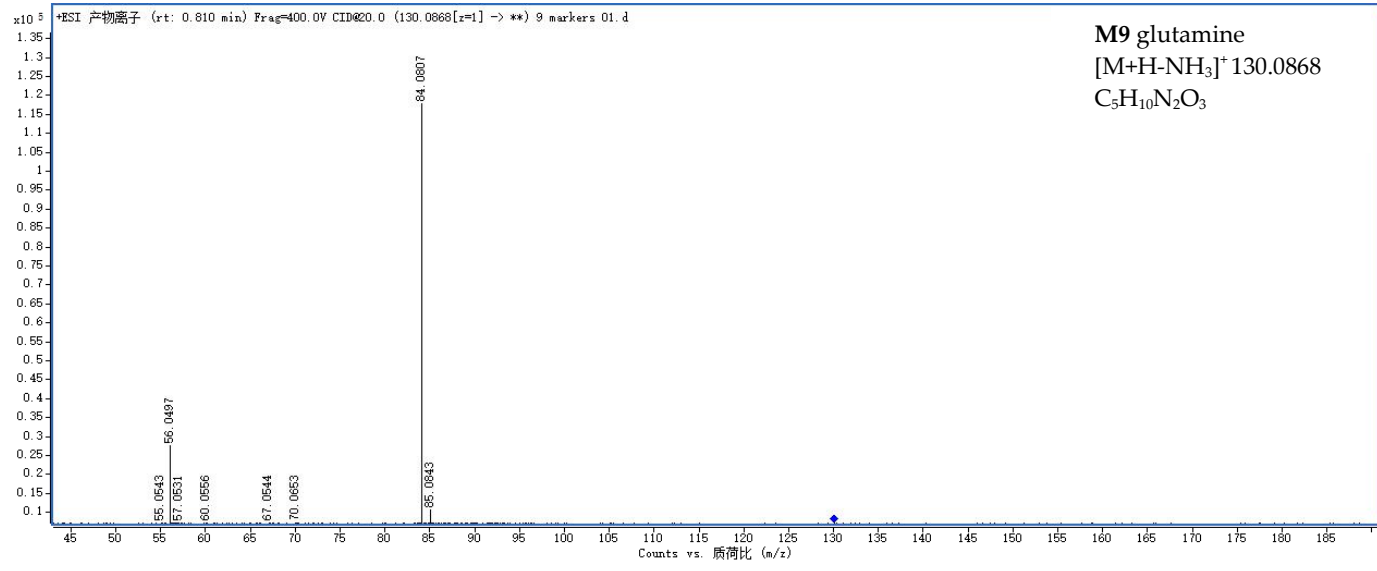

Supplement: molecules-24-03536-s001.pdf [file molecules-24-03536-s001.pdf]
